# Supplementary material
Source: Springer Nature journal article supplement (https://www.springermedizin.de/resource/supplementary/12885_2010_2715_MOESM5_ESM.pdf/9461866)

**NKI295-ANLN:  $P=0.0019$** 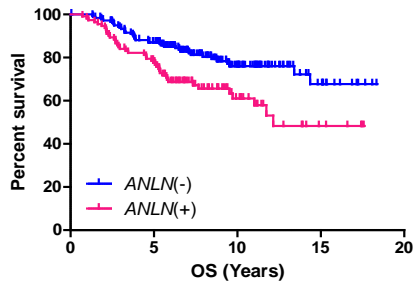**NKI295-KIF2C:  $P<0.0001$** 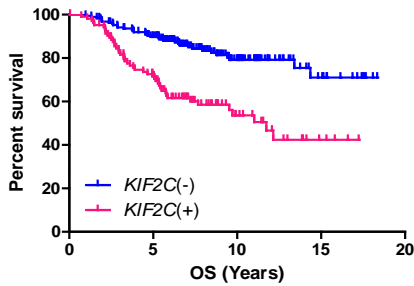**NKI295-MAPT:  $P=0.0069$** 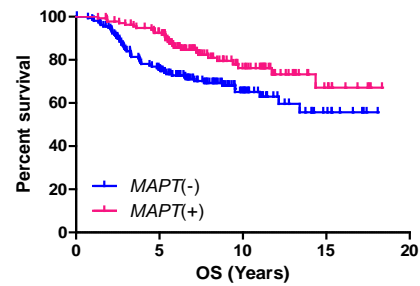**NKI295-ANLN:  $P=0.0104$** 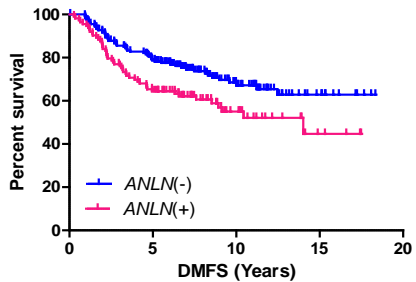**NKI295-KIF2C:  $P=0.0004$** 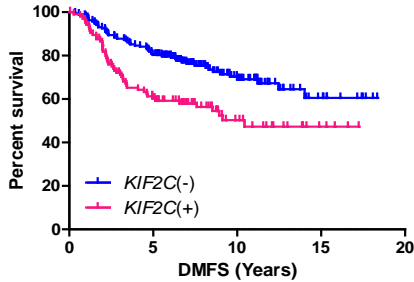**NKI295-MAPT:  $P=0.0233$** 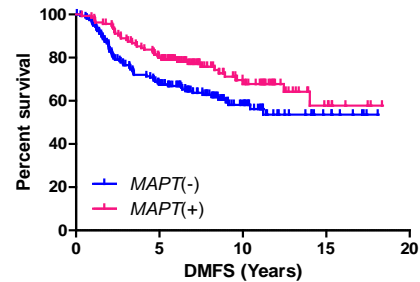**GIS251-ANLN:  $P=0.0094$** 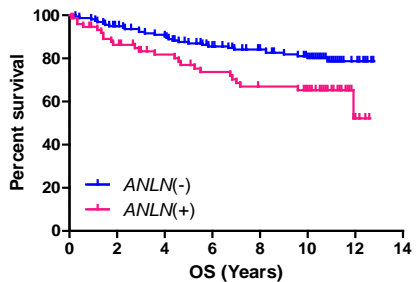**GIS251-KIF2C:  $P=0.0224$** 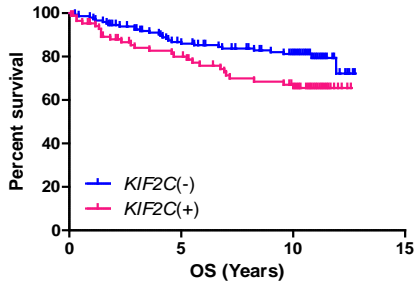**GIS251-MAPT:  $P=0.0012$** 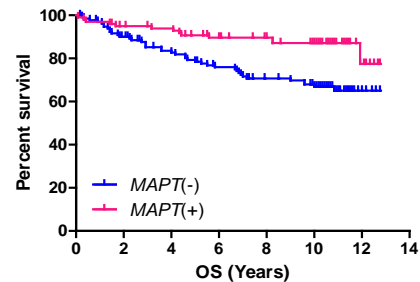**GIS251-ANLN:  $P=0.0040$** 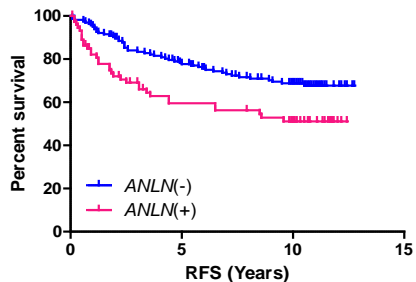**GIS251-KIF2C:  $P=0.0042$** 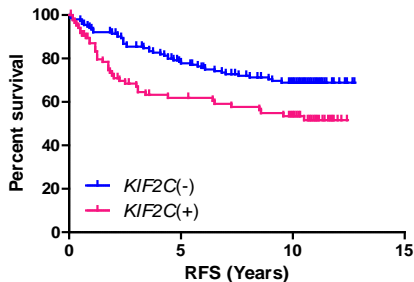**GIS251-MAPT:  $P=0.0137$** 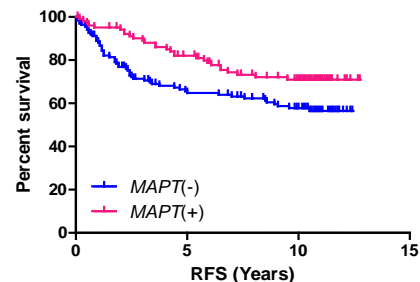

Supplement: MOESM5 [file 9461866]
